# Supplementary material for: Cytogenetic studies in Eigenmannia virescens (Sternopygidae, Gymnotiformes) and new inferences on the origin of sex chromosomes in the Eigenmannia genus
Source: Springer Nature journal article supplement (doi:10.1186/1471-2156-10-74), 2009-11-21
Supplement: 12863_2009_732_MOESM2_ESM.pdf [file 12863_2009_732_MOESM2_ESM.pdf]

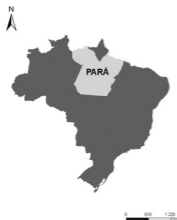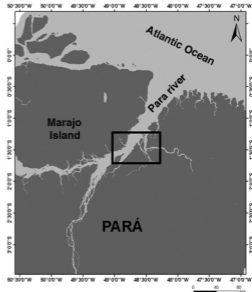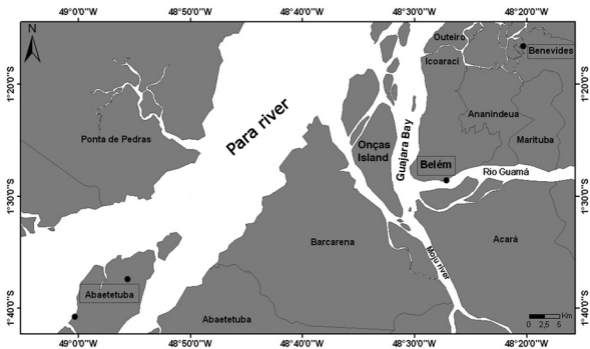

### Legends

-  Main rivers
-  Cities
-  Samples of *Eigenmannia virescens*
